# Supplementary material for: Molecular engineering in a family of pillared-layered metal–organic frameworks for tuning gas adsorption behavior
Source: Royal Society of Chemistry journal article supplement (doi:10.1039/d1dt00431j), 2021-01-01
Supplement: d1dt00431j1.pdf [file d1dt00431j1.pdf]

Electronic Supplementary Material (ESI) for Dalton Trans.  
This journal is © The Royal Society of Chemistry 2021

## Supplemental Information

**Molecular engineering in a family of pillared-layered metal-organic frameworks for tuning gas adsorption behavior**

**Shuai Liang, Fa-Yuan Ge, Shuang-Shuang Ren, Ming-Yuan Lei, Xiang-Jing Gao and He-Gen Zheng\***

*State Key Laboratory of Coordination Chemistry, School of Chemistry and Chemical Engineering, Collaborative Innovation Center of Advanced Microstructures, Nanjing University, Nanjing 210023, P. R. China*

Email: [zhenghg@nju.edu.cn](mailto:zhenghg@nju.edu.cn); Fax: 86-25-89682309

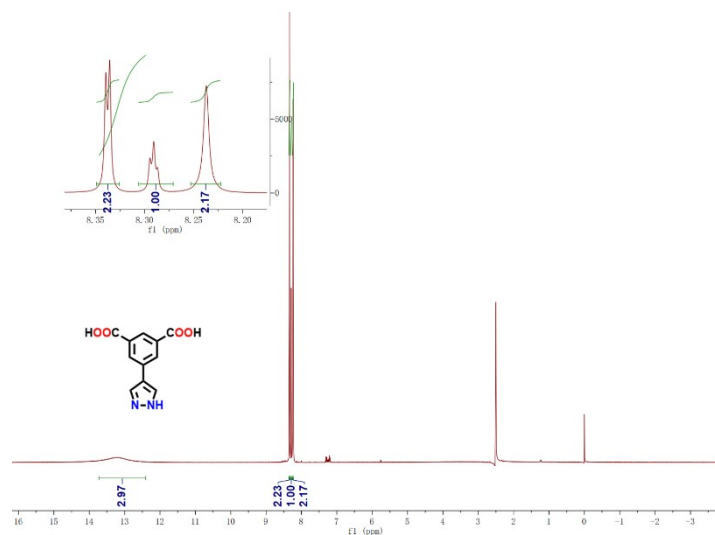

Fig. S1 NMR spectrum of H<sub>3</sub>L.

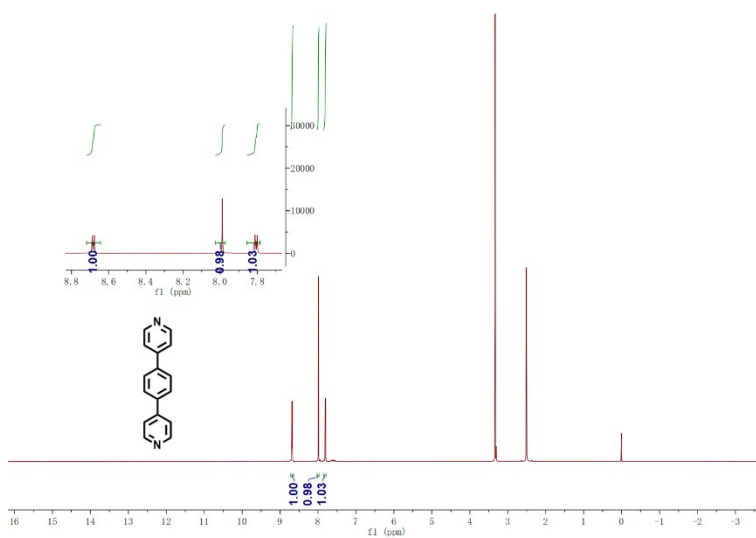

Fig. S2 NMR spectrum of dpb.

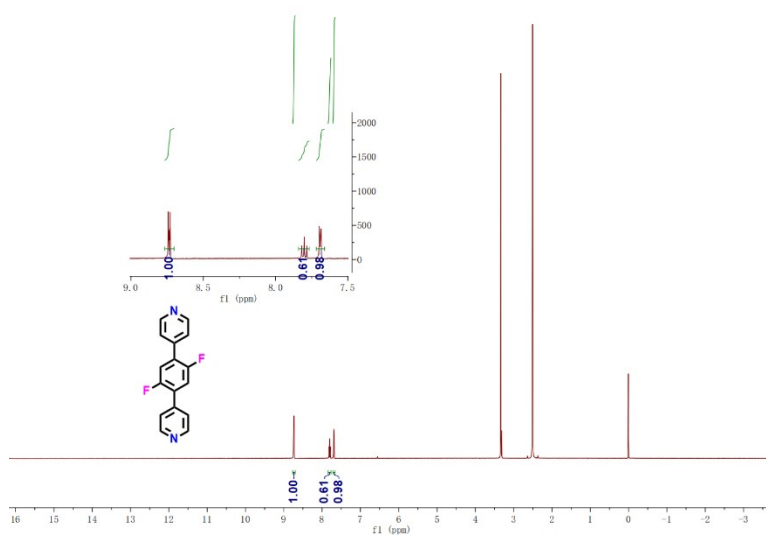

Fig. S3 NMR spectrum of dpd.

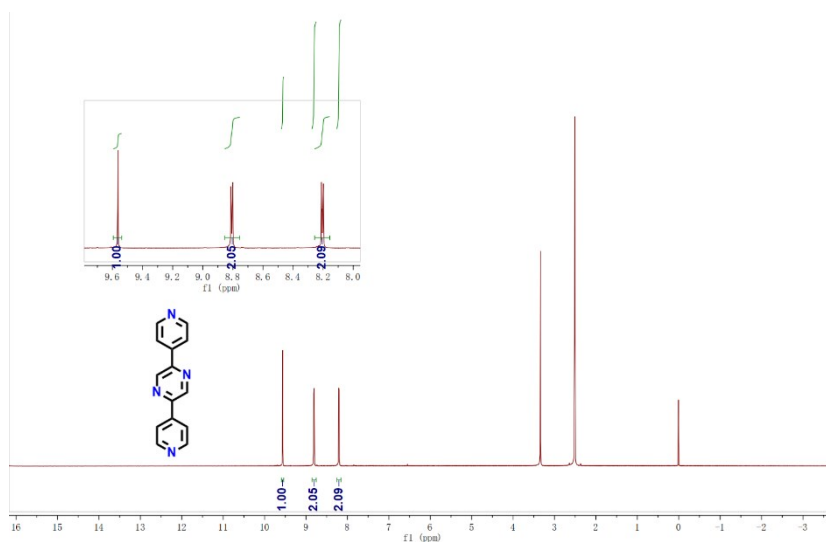

Fig. S4 NMR spectrum of dpp.

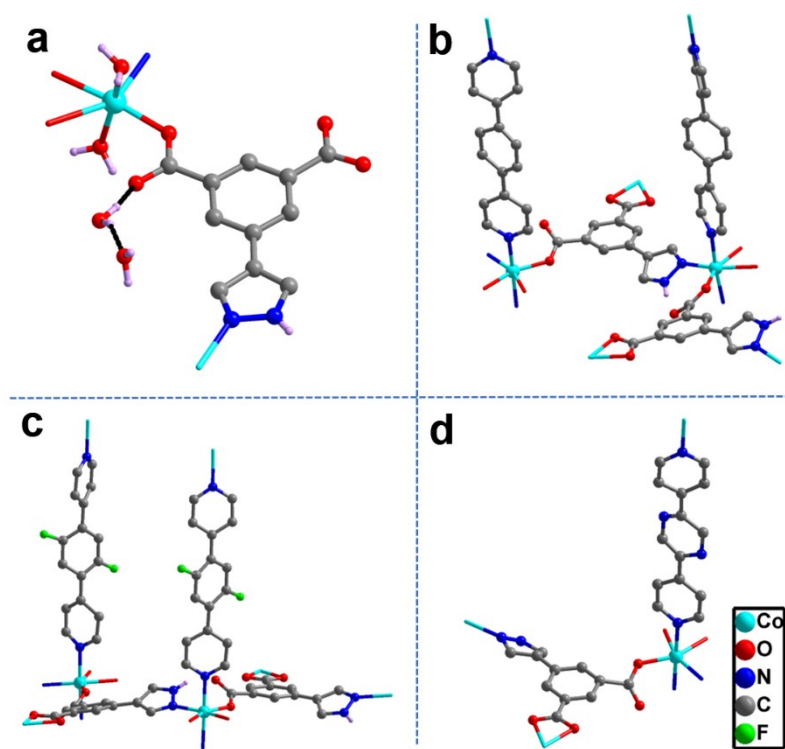

Fig. S5 The asymmetric units of **1** (a), **2-H** (b), **2-F** (c) and **2-N** (d), the disordered parts of ligands and hydrogen atoms are omitted for clarity.

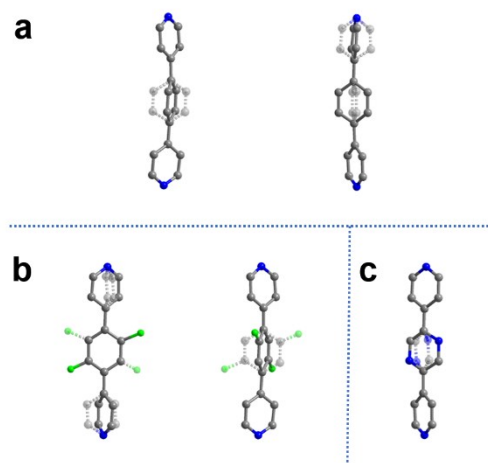

**Fig. S6** The disordered configurations of N-containing ligands in compounds **2-H** (a), **2-F** (b) and **2-N** (c).

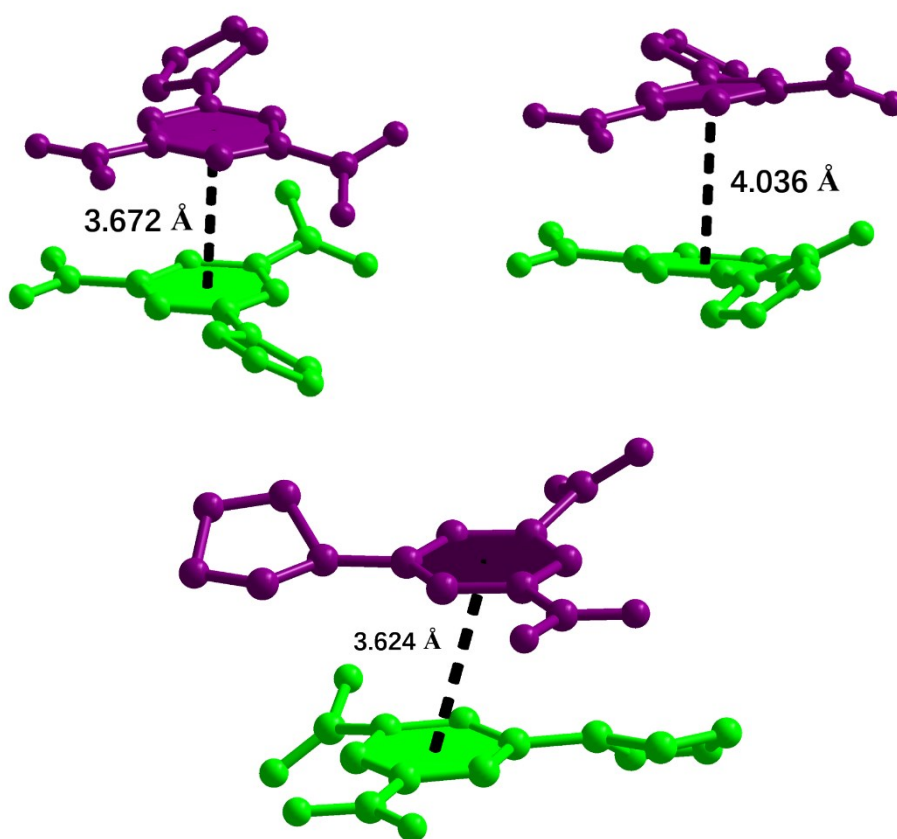

**Fig. S7** The  $\pi \cdots \pi$  interaction of ligand in **2-F** (top) and **2-N** (bottom).

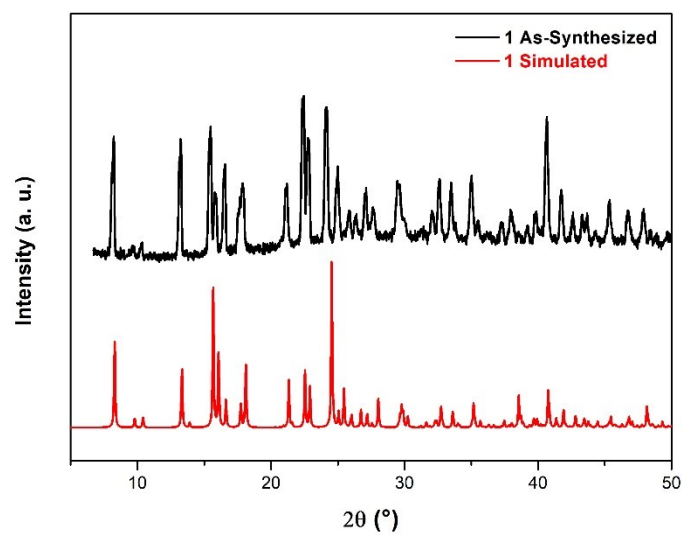

**Fig. S8** PXRd patterns of compound 1.

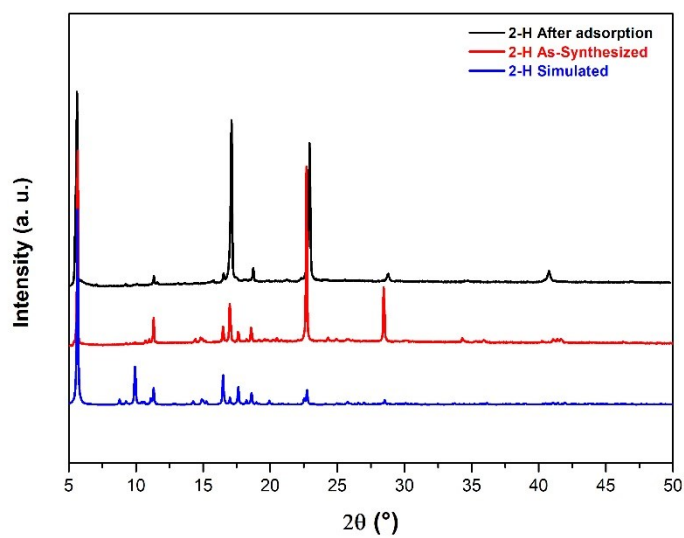

**Fig. S9** PXRd patterns of 2-H simulated, as-synthesized and after adsorption.

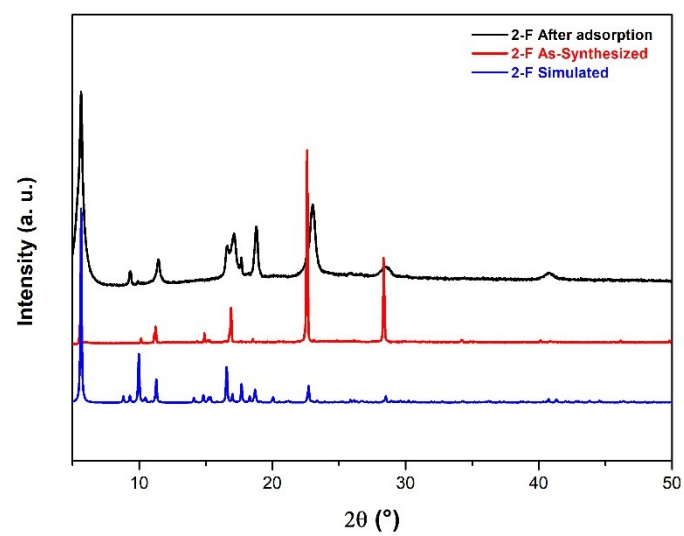

**Fig. S10** PXRd patterns of 2-F simulated, as-synthesized and after adsorption.

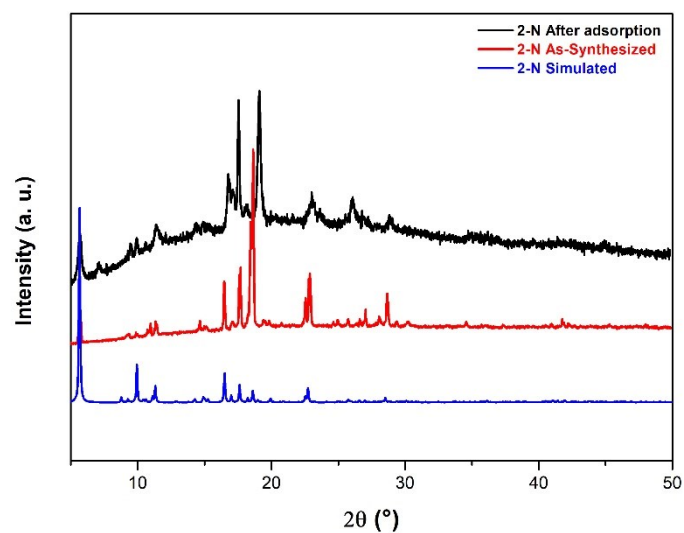

**Fig. S11** PXRD patterns of 2-N simulated, as-synthesized and after adsorption.

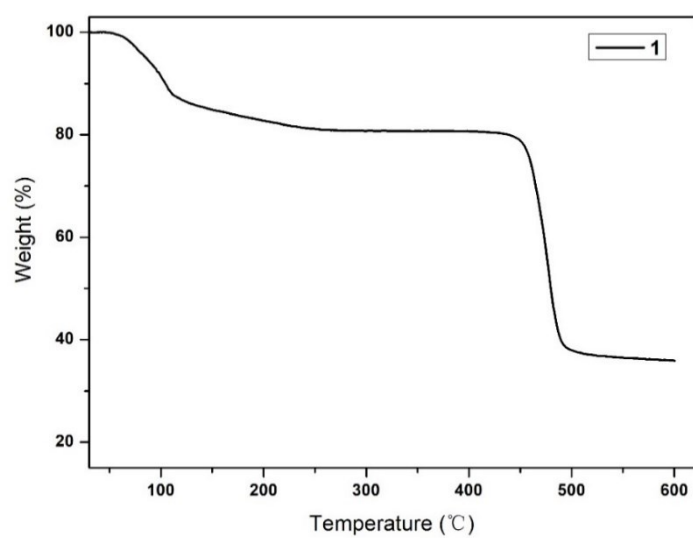

**Fig S12.** TGA curve of compound 1.

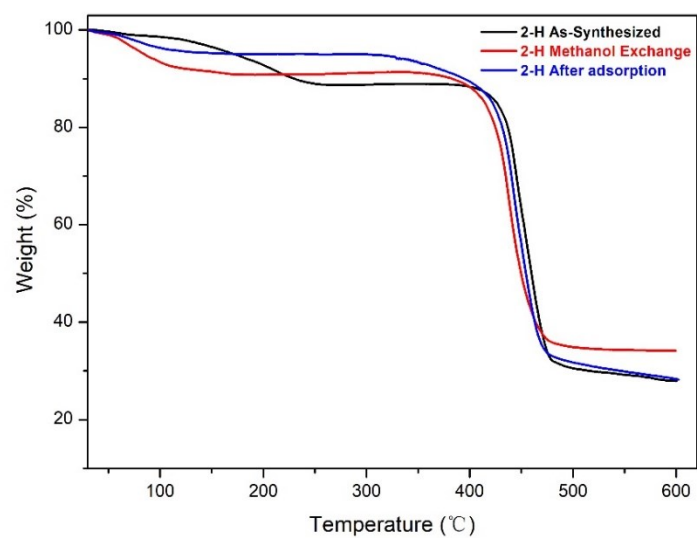

**Fig. S13** TGA curves of 2-H after as-synthesized, methanol exchange and adsorption.

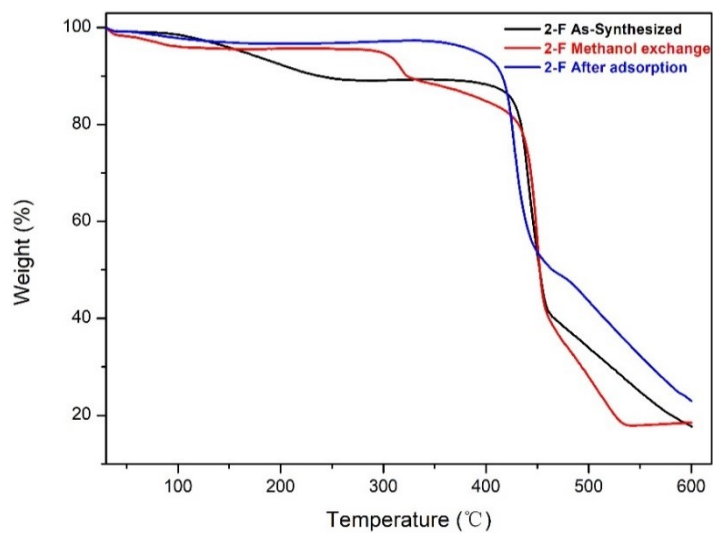

**Fig. S14** TGA curves of **2-F** after as-synthesized, methanol exchange and adsorption.

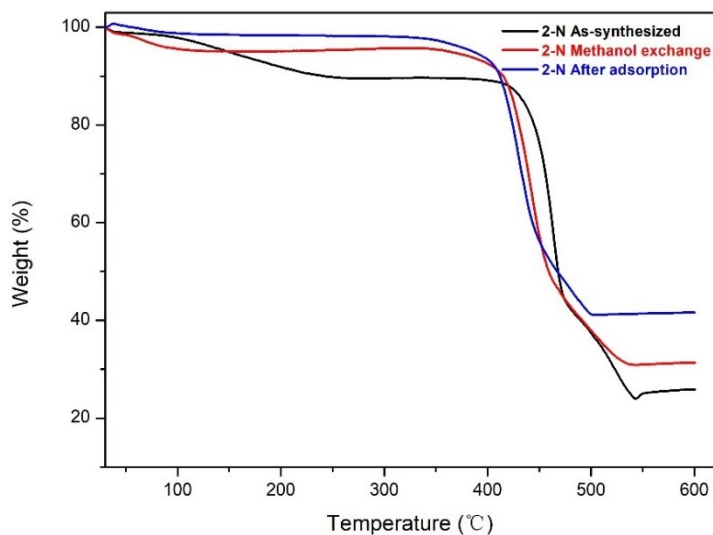

**Fig. S15** TGA curves of **2-N** after as-synthesized, methanol exchange and adsorption.

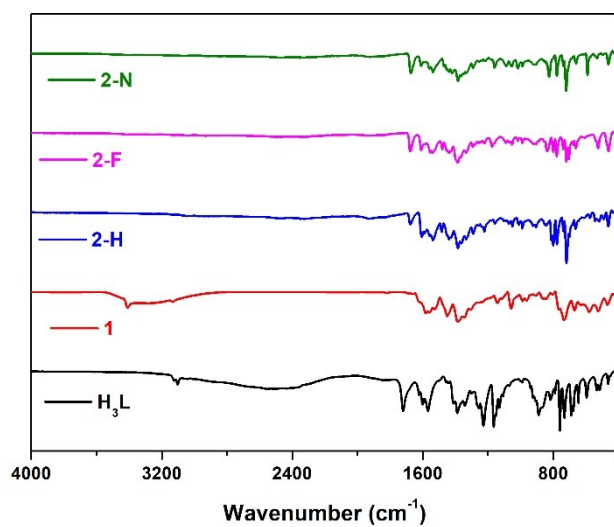

**Fig S16.** FT-IR spectra of H<sub>3</sub>L, **1**, **2-H**, **2-F** and **2-N**.

## Calculation of BET and Langmuir surface areas

The well-known BET isotherm model can be expressed by the following equation:

$$\frac{P}{Q(P_0 - P)} = \frac{1}{bQ_0} + \frac{b-1}{bQ_0} \left( \frac{P}{P_0} \right)$$

When the number of adsorption layers is 1, Langmuir isotherm model can be obtained by the following equation:

$$\frac{P}{Q} = \frac{1}{bQ_0} + \frac{1}{Q_0} P$$

Where  $Q$  ( $\text{cm}^3 \text{g}^{-1}$ ) is the amount adsorbed;  $Q_0$  ( $\text{cm}^3 \text{g}^{-1}$ ) is the saturated amount adsorbed;  $P/\text{mmHg}$  is the equilibrium pressure; and  $b/\text{mmHg}^{-1}$  is the adsorption affinity.

A least-squares fit is performed on the  $\left( \frac{P}{Q(P_0 - P)}, \frac{P}{P_0} \right)$  designated pairs where  $\frac{P}{Q(P_0 - P)}$  is the independent variable and  $\frac{P}{P_0}$  is the dependent variable. Similarly, for Langmuir adsorption, a least-squares fit is performed on the  $\left( \frac{P}{Q}, P \right)$  designated pairs where  $\frac{P}{Q}$  is the independent variable and  $P$  is the dependent variable. The following are calculated:

- Slope  $\left( \frac{b-1}{bQ_0}, \text{g}/\text{cm}^3 \text{STP} \right)$  for BET, Slope  $\left( \frac{1}{Q_0}, \text{g}/\text{cm}^3 \text{STP} \right)$  for Langmuir
- Y-intercept  $\left( \frac{1}{bQ_0}, \text{g} \cdot \text{mmHg}/\text{cm}^3 \text{STP} \right)$
- Error of the slope ( $\text{g}/\text{cm}^3 \text{STP}$ )
- Error of the y-intercept ( $\text{g} \cdot \text{mmHg}/\text{cm}^3 \text{STP}$ )

Using the results of the above calculations, the BET or Langmuir surface area can be calculated as following:

$$S = A_m \times N_A \times \frac{Q_0}{22414} \times 10^{-18}$$

Where  $S$  is the BET or Langmuir surface area ( $\text{m}^2/\text{g}$ );  $A_m$  = molecular cross-sectional area ( $\text{nm}^2$ ) of adsorbate i.e.  $0.1700 \text{ nm}^2$  for  $\text{CO}_2$ ,<sup>1</sup> and  $N_A = 6.02 \times 10^{23}$ .



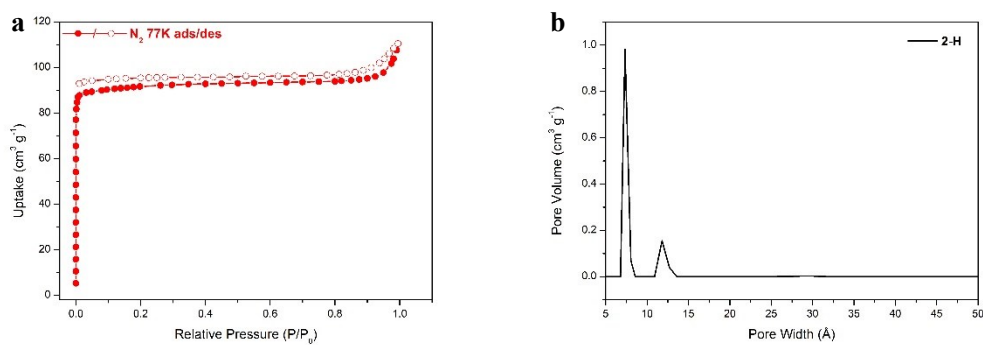

**Fig. S17** (a)  $N_2$  sorption isotherm at 77 K for **2-H**. (b) Pore size distribution for **2-H**.

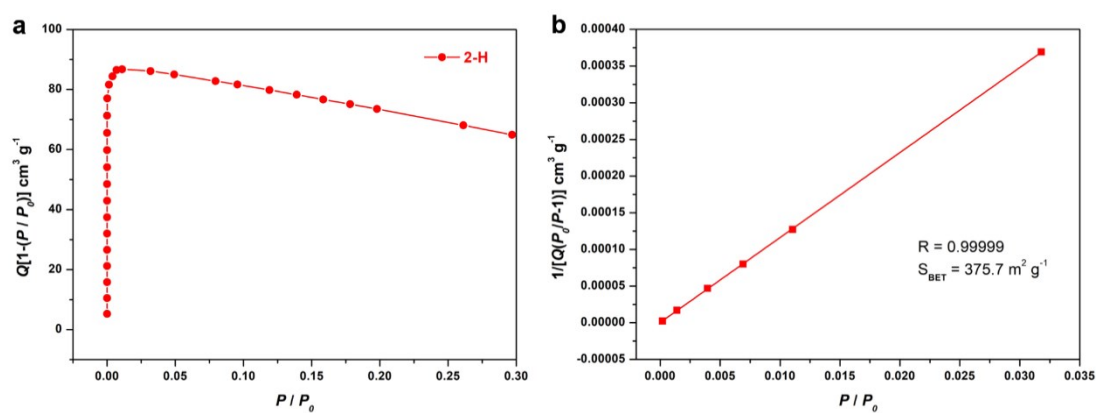

**Fig. S18** (a)  $V[1-(P/P_0)]$  vs  $P/P_0$  for **2-H**, only the range below  $P/P_0 = 0.03$  satisfies the first consistency criterion for applying the BET theory. (b) Plot of the linear region for the BET equation.

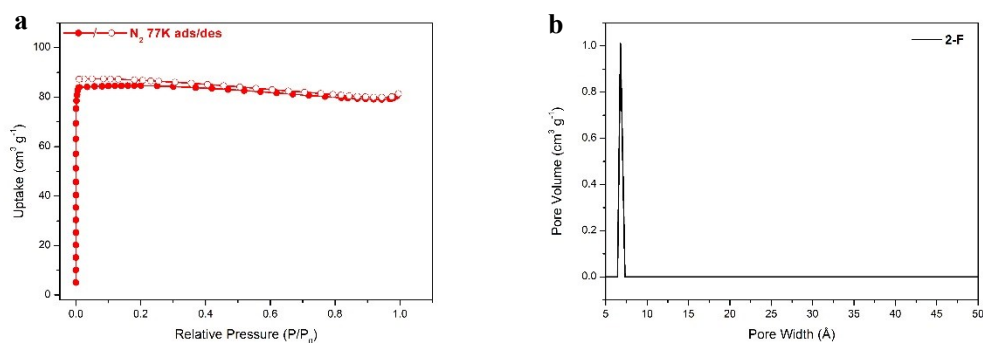

**Fig. S19** (a)  $N_2$  sorption isotherm at 77 K for **2-F**. (b) Pore size distribution for **2-F**.

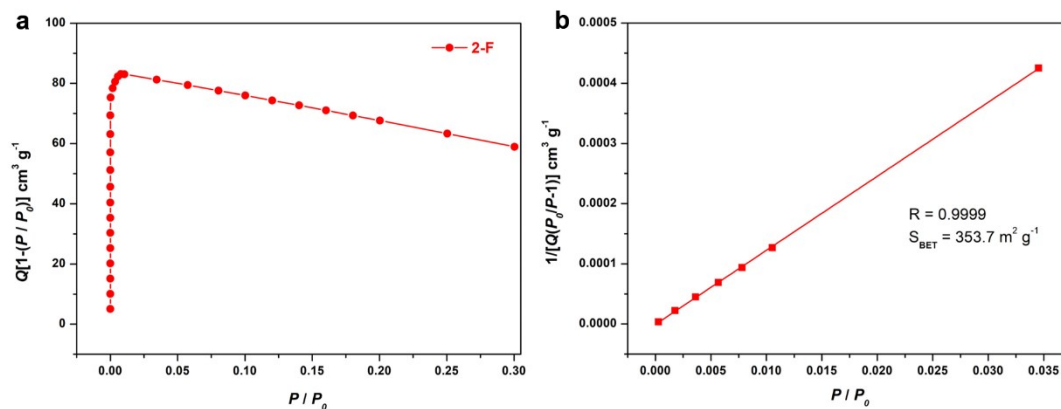

**Fig. S20** (a)  $V[1-(P/P_0)]$  vs  $P/P_0$  for **2-F**, only the range below  $P/P_0 = 0.03$  satisfies the first consistency criterion for applying the BET theory. (b) Plot of the linear region for the BET equation.

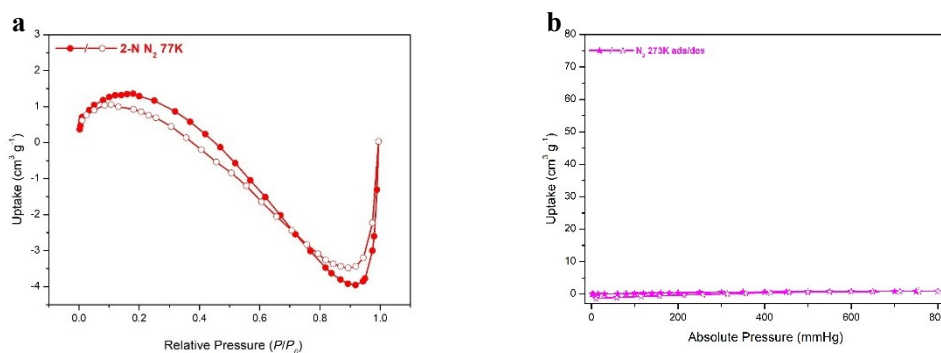

**Fig S21.**  $N_2$  isotherms of **2-N** at 77 K (a) and 273K (b).

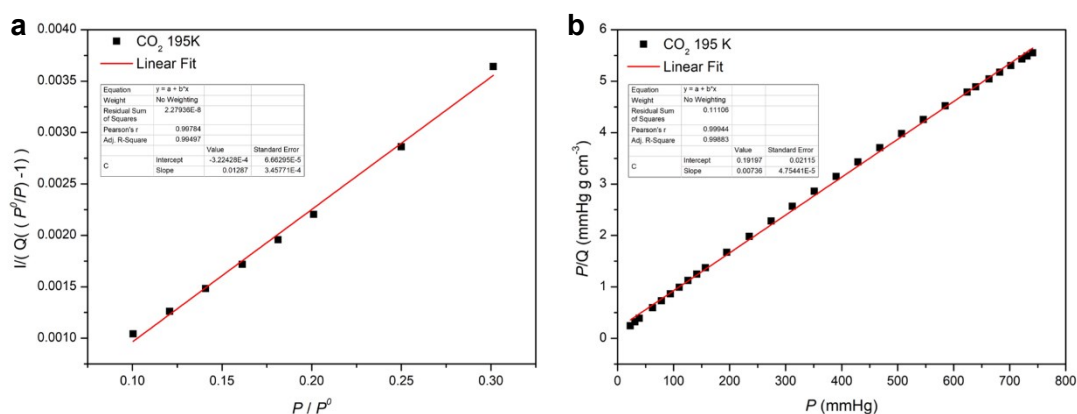

$$S_{\text{BET}} = (1 / (0.01287 - 0.000322428)) / 22414 \times 6.02 \times 10^{23} \times 0.170 \times 10^{-18} = 363.9 \text{ m}^2 \text{ g}^{-1}.$$

$$S_{\text{Langmuir}} = ((1 / 0.00736) / 22414) \times 6.02 \times 10^{23} \times 0.170 \times 10^{-18} = 620.4 \text{ m}^2 \text{ g}^{-1}.$$

**Fig. S22** The BET (a) and Langmuir (b) surface areas of **2-H** obtained from the  $\text{CO}_2$  adsorption isotherm at 195 K.

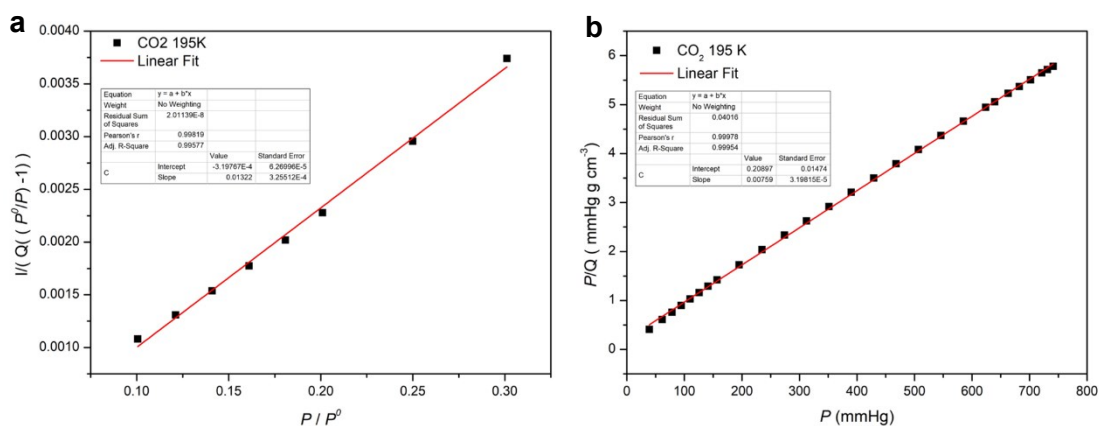

$$S_{\text{BET}} = (1 / (0.01322 - 0.000319767)) / 22414 \times 6.02 \times 10^{23} \times 0.170 \times 10^{-18} = 353.9 \text{ m}^2 \text{ g}^{-1}$$

$$S_{\text{Langmuir}} = ((1 / 0.00759) / 22414) \times 6.02 \times 10^{23} \times 0.170 \times 10^{-18} = 601.6 \text{ m}^2 \text{ g}^{-1}$$

**Fig. S23** The BET (a) and Langmuir (b) surface areas of **2-F** obtained from the CO<sub>2</sub> adsorption isotherm at 195 K.

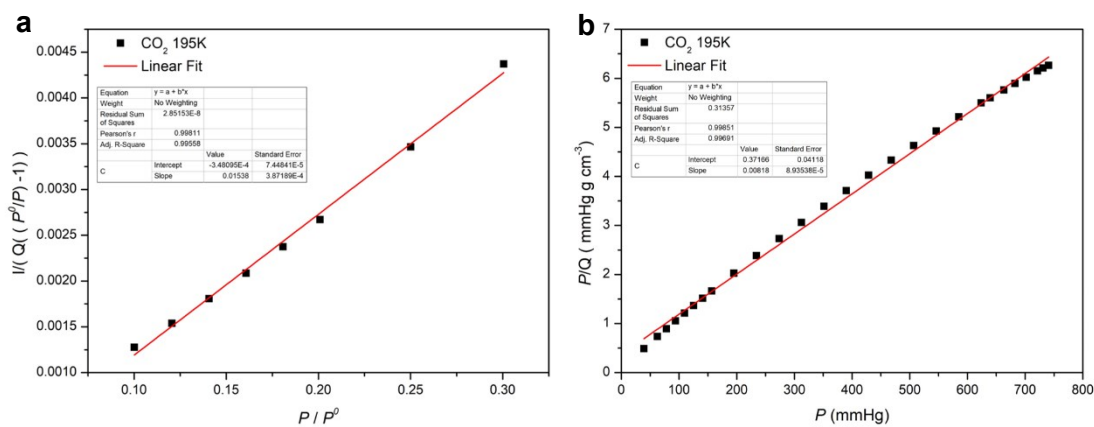

$$S_{\text{BET}} = (1 / (0.01538 - 0.000348095)) / 22414 \times 6.02 \times 10^{23} \times 0.170 \times 10^{-18} = 303.7 \text{ m}^2 \text{ g}^{-1}$$

$$S_{\text{Langmuir}} = ((1 / 0.00818) / 22414) \times 6.02 \times 10^{23} \times 0.170 \times 10^{-18} = 558.2 \text{ m}^2 \text{ g}^{-1}$$

**Fig. S24** The BET (a) and Langmuir (b) surface areas of **2-N** obtained from the CO<sub>2</sub> adsorption isotherm at 195 K.

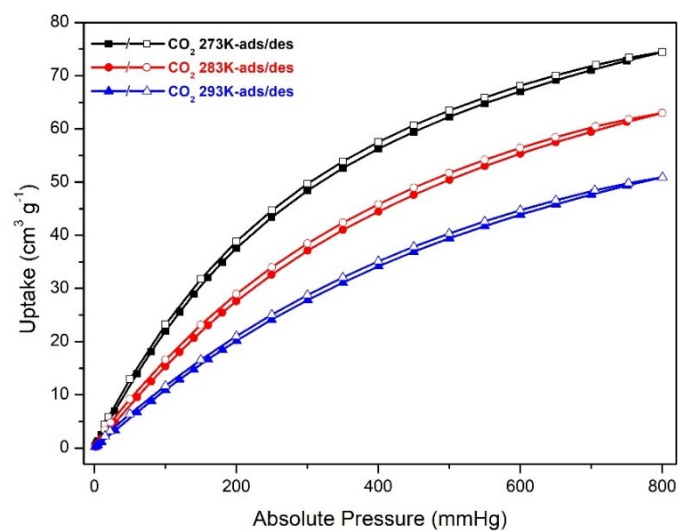

Fig. S25 CO<sub>2</sub> isotherms of 2-H at 273, 283 and 293 K.

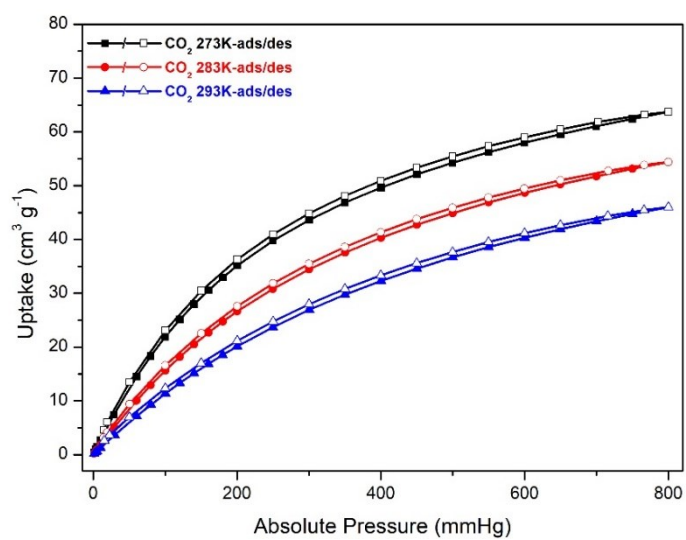

Fig. S26 CO<sub>2</sub> isotherms of 2-F at 273, 283 and 293 K.

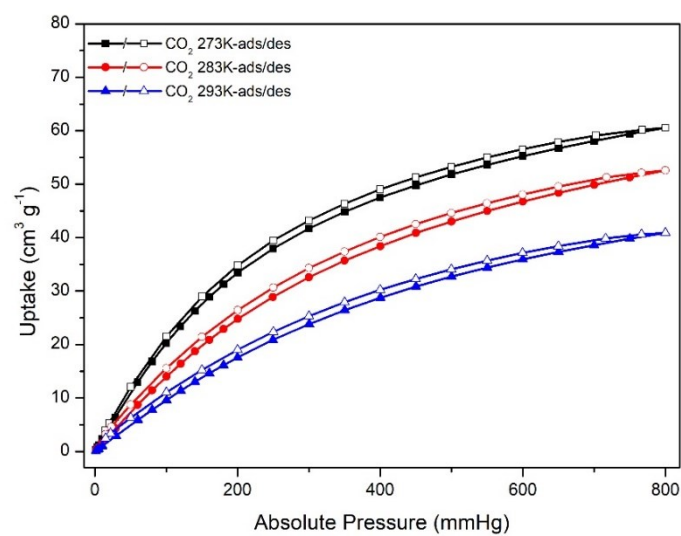

Fig. S27 CO<sub>2</sub> isotherms of 2-N at 273, 283 and 293 K.

### IAST Analysis of the selectivity data in 2-H, 2-F and 2-N.

Ideal adsorbed solution theory (IAST)<sup>2</sup> was used to determine the selectivity factor,  $S$ , for binary mixtures using pure component isotherm data. The selectivity factor,  $S$ , is defined according to Equation 1 where  $x_i$  is the amount of each component adsorbed as determined from IAST and  $y_i$  is the mole fraction of each component in the gas phase at equilibrium. The IAST adsorption selectivities were calculated for CO<sub>2</sub>/N<sub>2</sub> and CO<sub>2</sub>/CH<sub>4</sub> binary mixtures of compositions (15:85) and (50:50) at 273 K and a total pressure of 1.0 bar.

$$S = \frac{x_1/y_1}{x_2/y_2} \quad (1)$$

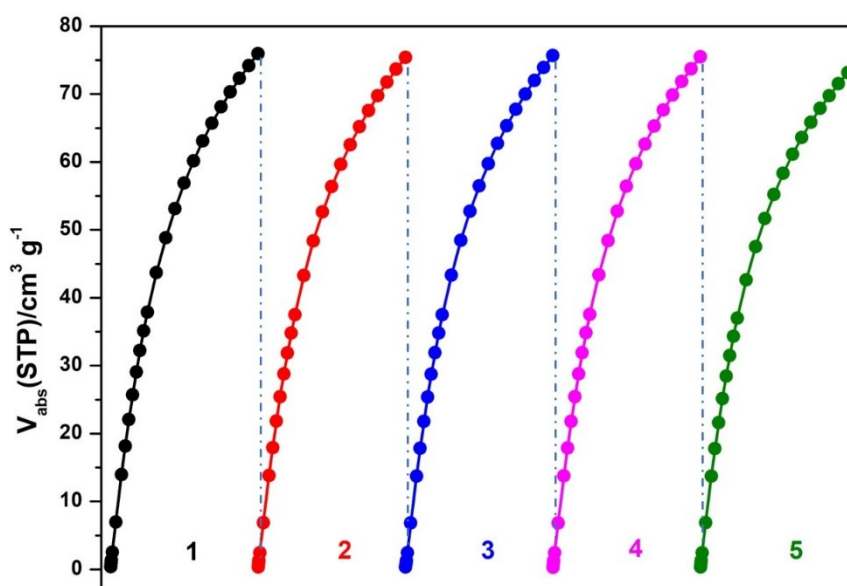

Fig. S28 5 cycles of CO<sub>2</sub> uptake of 2-H at 273 K.

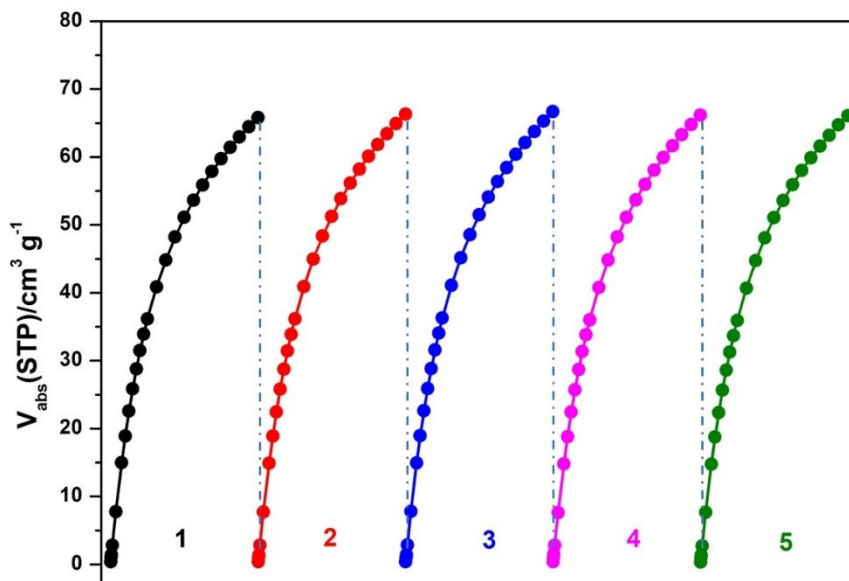

Fig. S29 5 cycles of CO<sub>2</sub> uptake of 2-F at 273 K.

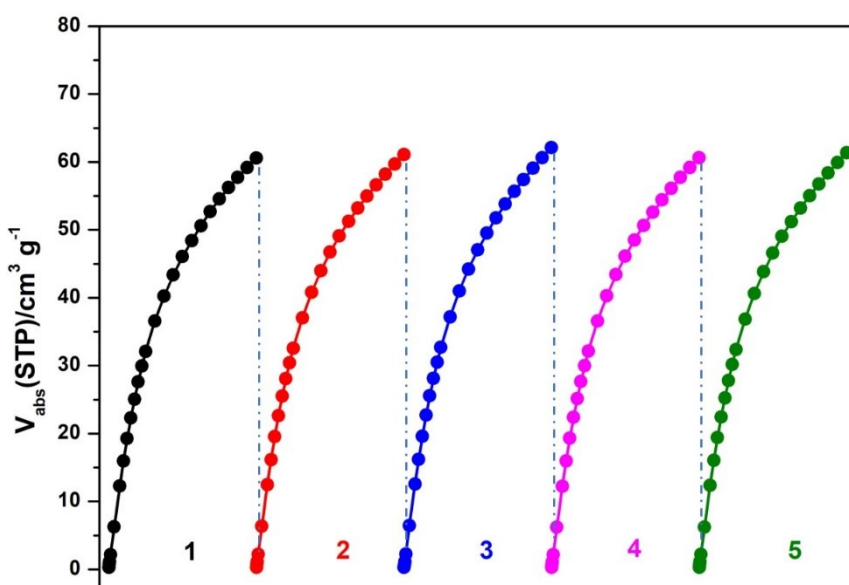

Fig. S30 5 cycles of CO<sub>2</sub> uptake of 2-N at 273 K.

**Table S1.** Crystal and Structure Refinement Data for compounds **1**, **2-H**, **2-F** and **2-N**.

| Identification code                                    | <b>1</b>                                                           | <b>2-H</b>                                                                      | <b>2-F</b>                                                                                     | <b>2-N</b>                                                         |
|--------------------------------------------------------|--------------------------------------------------------------------|---------------------------------------------------------------------------------|------------------------------------------------------------------------------------------------|--------------------------------------------------------------------|
| Empirical formula                                      | C <sub>11</sub> H <sub>14</sub> CoN <sub>2</sub> O <sub>8</sub>    | C <sub>60</sub> H <sub>50</sub> Co <sub>2</sub> N <sub>10</sub> O <sub>10</sub> | C <sub>60</sub> H <sub>56</sub> Co <sub>2</sub> F <sub>4</sub> N <sub>10</sub> O <sub>10</sub> | C <sub>28</sub> H <sub>23</sub> CoN <sub>7</sub> O <sub>5</sub>    |
| Formula weight                                         | 361.17                                                             | 1188.95                                                                         | 1260.91                                                                                        | 596.46                                                             |
| Temperature (K)                                        | 296(2)                                                             | 190.07                                                                          | 296(2)                                                                                         | 296(2)                                                             |
| Wavelength (Å)                                         | 0.71073                                                            | 1.34139                                                                         | 0.71073                                                                                        | 0.71073                                                            |
| Crystal system                                         | Orthorhombic                                                       | Monoclinic                                                                      | Monoclinic                                                                                     | Monoclinic                                                         |
| Space group                                            | <i>Pbca</i>                                                        | <i>P2/n</i>                                                                     | <i>C2/c</i>                                                                                    | <i>P2/c</i>                                                        |
| <i>a</i> (Å)                                           | 17.0748(9)                                                         | 19.079(4)                                                                       | 31.3666(10)                                                                                    | 15.5398(13)                                                        |
| <i>b</i> (Å)                                           | 7.2456(4)                                                          | 10.058(2)                                                                       | 20.0379(7)                                                                                     | 10.0374(9)                                                         |
| <i>c</i> (Å)                                           | 21.3863(10)                                                        | 31.296(6)                                                                       | 19.0191(6)                                                                                     | 19.0268(19)                                                        |
| $\alpha$ (°)                                           | 90                                                                 | 90                                                                              | 90                                                                                             | 90                                                                 |
| $\beta$ (°)                                            | 90                                                                 | 92.92(3)                                                                        | 94.3920(10)                                                                                    | 90.593(3)                                                          |
| $\gamma$ (°)                                           | 90                                                                 | 90                                                                              | 90                                                                                             | 90                                                                 |
| <i>V</i> (Å <sup>3</sup> )                             | 2645.9(10)                                                         | 5998(2)                                                                         | 11918.8(7)                                                                                     | 2967.6(5)                                                          |
| <i>Z</i>                                               | 8                                                                  | 4                                                                               | 8                                                                                              | 4                                                                  |
| $\rho_{\text{calc}}$ (g/cm <sup>3</sup> )              | 1.813                                                              | 1.155                                                                           | 1.242                                                                                          | 1.171                                                              |
| $\mu$ (mm <sup>-1</sup> )                              | 1.344                                                              | 3.272                                                                           | 0.623                                                                                          | 0.614                                                              |
| <i>F</i> (000)                                         | 1480                                                               | 2136                                                                            | 4528                                                                                           | 1068                                                               |
| Reflections collected                                  | 22252                                                              | 36906                                                                           | 50157                                                                                          | 24348                                                              |
| Independent reflections                                | 3050                                                               | 10693                                                                           | 12668                                                                                          | 6795                                                               |
| <i>R</i> (int)                                         | 0.0599                                                             | 0.0589                                                                          | 0.0572                                                                                         | 0.0860                                                             |
| Data / restraints / parameters                         | 3050 / 13 / 226                                                    | 10693 / 330 / 760                                                               | 12668 / 824 / 869                                                                              | 6795 / 170 / 400                                                   |
| GOF on <i>F</i> <sup>2</sup>                           | 1.036                                                              | 1.044                                                                           | 1.035                                                                                          | 1.039                                                              |
| Final <i>R</i> indices<br>[ <i>I</i> > 2σ( <i>I</i> )] | <i>R</i> <sub>1</sub> = 0.0305,<br><i>wR</i> <sub>2</sub> = 0.0640 | <i>R</i> <sub>1</sub> = 0.0679,<br><i>wR</i> <sub>2</sub> = 0.1870              | <i>R</i> <sub>1</sub> = 0.0805,<br><i>wR</i> <sub>2</sub> = 0.2255                             | <i>R</i> <sub>1</sub> = 0.0617,<br><i>wR</i> <sub>2</sub> = 0.1540 |
| <i>R</i> indices (all data)                            | <i>R</i> <sub>1</sub> = 0.0484,<br><i>wR</i> <sub>2</sub> = 0.0701 | <i>R</i> <sub>1</sub> = 0.0882,<br><i>wR</i> <sub>2</sub> = 0.2024              | <i>R</i> <sub>1</sub> = 0.1233,<br><i>wR</i> <sub>2</sub> = 0.2723                             | <i>R</i> <sub>1</sub> = 0.0877,<br><i>wR</i> <sub>2</sub> = 0.1699 |

**Table S2.** Selected Bond Lengths (Å) and bond angles (°) for Compounds **1**, **2-H**, **2-F** and **2-N**.

| Compound <b>1</b>                            |            |                                 |            |
|----------------------------------------------|------------|---------------------------------|------------|
| Co(1)-O(2)                                   | 2.0517(14) | Co(1)-O(1W)                     | 2.0589(15) |
| Co(1)-N(2) <sup>#1</sup>                     | 2.0720(17) | Co(1)-O(2W)                     | 2.1123(15) |
| Co(1)-O(4) <sup>#2</sup>                     | 2.1186(14) | Co(1)-O(3) <sup>#2</sup>        | 2.3493(14) |
| O(2)-Co(1)-O(1W)                             | 88.10(6)   | O(2)-Co(1)-N(2) <sup>#1</sup>   | 88.45(6)   |
| O(1W)-Co(1)-N(2) <sup>#1</sup>               | 102.25(6)  | O(2)-Co(1)-O(2W)                | 88.63(6)   |
| O(1W)-Co(1)-O(2W)                            | 166.83(6)  | N(2) <sup>#1</sup> -Co(1)-O(2W) | 90.40(6)   |
| O(2)-Co(1)-O(4) <sup>#2</sup>                | 175.39(6)  | O(1W)-Co(1)-O(4) <sup>#2</sup>  | 87.31(6)   |
| N(2) <sup>#1</sup> -Co(1)-O(4) <sup>#2</sup> | 92.82(6)   | O(2W)-Co(1)-O(4) <sup>#2</sup>  | 95.79(5)   |
| O(2)-Co(1)-O(3) <sup>#2</sup>                | 121.09(5)  | O(1W)-Co(1)-O(3) <sup>#2</sup>  | 86.85(5)   |
| N(2) <sup>#1</sup> -Co(1)-O(3) <sup>#2</sup> | 149.62(6)  | O(2W)-Co(1)-O(3) <sup>#2</sup>  | 83.94(5)   |
| O(4) <sup>#2</sup> -Co(1)-O(3) <sup>#2</sup> | 58.34(5)   |                                 |            |
| Compound <b>2-H</b>                          |            |                                 |            |
| Co(1)-O(6)                                   | 2.057(3)   | Co(2)-O(1) <sup>#3</sup>        | 2.139(3)   |
| Co(1)-O(7) <sup>#1</sup>                     | 2.151(3)   | Co(2)-O(2) <sup>#3</sup>        | 2.184(3)   |
| Co(1)-O(8) <sup>#1</sup>                     | 2.176(3)   | Co(2)-O(4)                      | 2.065(3)   |
| Co(1)-N(1)                                   | 2.127(3)   | Co(2)-N(4) <sup>#4</sup>        | 2.132(3)   |
| Co(1)-N(6) <sup>#2</sup>                     | 2.163(4)   | Co(2)-N(5)                      | 2.142(3)   |
| Co(1)-N(7)                                   | 2.137(4)   | Co(2)-N(8) <sup>#5</sup>        | 2.157(4)   |
| O(6)-Co(1)-O(7) <sup>#1</sup>                | 156.26(10) | O(4)-Co(2)-O(1) <sup>#3</sup>   | 153.95(10) |
| O(6)-Co(1)-O(8) <sup>#1</sup>                | 95.13(10)  | O(4)-Co(2)-O(2) <sup>#3</sup>   | 93.24(11)  |
| O(6)-Co(1)-N(1)                              | 106.50(12) | O(4)-Co(2)-N(4) <sup>#4</sup>   | 107.53(12) |
| O(6)-Co(1)-N(6) <sup>#2</sup>                | 91.80(12)  | O(4)-Co(2)-N(5)                 | 91.03(12)  |



|                                              |            |                                              |            |
|----------------------------------------------|------------|----------------------------------------------|------------|
| O(6)-Co(1)-N(7)                              | 90.16(12)  | O(4)-Co(2)-N(8) <sup>#5</sup>                | 90.54(12)  |
| O(7) <sup>#1</sup> -Co(1)-O(8) <sup>#1</sup> | 61.13(10)  | N(4) <sup>#4</sup> -Co(2)-O(1) <sup>#3</sup> | 98.48(11)  |
| O(7) <sup>#1</sup> -Co(1)-N(6) <sup>#2</sup> | 87.76(12)  | N(4) <sup>#4</sup> -Co(2)-O(2) <sup>#3</sup> | 159.14(12) |
| N(1)-Co(1)-O(7) <sup>#1</sup>                | 97.20(11)  | N(4) <sup>#4</sup> -Co(2)-N(5)               | 89.23(13)  |
| N(1)-Co(1)-O(8) <sup>#1</sup>                | 158.04(12) | N(4) <sup>#4</sup> -Co(2)-N(8) <sup>#5</sup> | 92.17(14)  |
| N(1)-Co(1)-N(6) <sup>#2</sup>                | 87.99(14)  | N(5)-Co(2)-O(2) <sup>#3</sup>                | 88.51(12)  |
| N(1)-Co(1)-N(7)                              | 95.21(14)  | N(5)-Co(2)-N(8) <sup>#5</sup>                | 177.49(13) |
| N(6) <sup>#2</sup> -Co(1)-O(8) <sup>#1</sup> | 87.62(12)  | N(8) <sup>#5</sup> -Co(2)-O(2) <sup>#3</sup> | 89.44(12)  |
| N(7)-Co(1)-O(7) <sup>#1</sup>                | 88.86(11)  | O(1) <sup>#3</sup> -Co(2)-N(5)               | 87.83(12)  |
| N(7)-Co(1)-O(8) <sup>#1</sup>                | 88.31(12)  | O(1) <sup>#3</sup> -Co(2)-N(8) <sup>#5</sup> | 89.90(12)  |
| N(7)-Co(1)-N(6) <sup>#2</sup>                | 175.62(13) | O(1) <sup>#3</sup> -Co(2)-O(2) <sup>#3</sup> | 60.71(10)  |

---

Compound **2-F**

---

|                               |            |                                              |            |
|-------------------------------|------------|----------------------------------------------|------------|
| Co(1)-O(5)                    | 2.057(3)   | Co(2)-O(4)                                   | 2.063(3)   |
| Co(1)-N(1)                    | 2.124(4)   | Co(2)-N(3) <sup>#3</sup>                     | 2.118(4)   |
| Co(1)-N(5)                    | 2.143(4)   | Co(2)-N(7)                                   | 2.143(4)   |
| Co(1)-O(2) <sup>#1</sup>      | 2.148(3)   | Co(2)-O(7) <sup>#4</sup>                     | 2.144(3)   |
| Co(1)-N(8) <sup>#2</sup>      | 2.156(4)   | Co(2)-N(6) <sup>#5</sup>                     | 2.161(4)   |
| Co(1)-O(1) <sup>#1</sup>      | 2.171(3)   | Co(2)-O(8) <sup>#4</sup>                     | 2.162(3)   |
| O(5)-Co(1)-N(1)               | 107.25(14) | O(4)-Co(2)-N(3) <sup>#3</sup>                | 105.05(14) |
| O(5)-Co(1)-N(5)               | 91.57(13)  | O(4)-Co(2)-N(7)                              | 89.67(14)  |
| N(1)-Co(1)-N(5)               | 89.70(15)  | N(3) <sup>#3</sup> -Co(2)-N(7)               | 94.79(15)  |
| O(5)-Co(1)-O(2) <sup>#1</sup> | 153.74(12) | O(4)-Co(2)-O(7) <sup>#4</sup>                | 155.89(12) |
| N(1)-Co(1)-O(2) <sup>#1</sup> | 99.01(13)  | N(3) <sup>#3</sup> -Co(2)-O(7) <sup>#4</sup> | 99.06(13)  |
| N(5)-Co(1)-O(2) <sup>#1</sup> | 89.20(13)  | N(7)-Co(2)-O(7) <sup>#4</sup>                | 88.31(14)  |
| O(5)-Co(1)-N(8) <sup>#2</sup> | 90.32(15)  | O(4)-Co(2)-N(6) <sup>#5</sup>                | 92.08(15)  |
| N(1)-Co(1)-N(8) <sup>#2</sup> | 90.26(17)  | N(3) <sup>#3</sup> -Co(2)-N(6) <sup>#5</sup> | 86.97(16)  |
| N(5)-Co(1)-N(8) <sup>#2</sup> | 178.03(16) | N(7)-Co(2)-N(6) <sup>#5</sup>                | 177.12(15) |

|                                              |            |                                              |            |
|----------------------------------------------|------------|----------------------------------------------|------------|
| O(2) <sup>#1</sup> -Co(1)-N(8) <sup>#2</sup> | 88.87(15)  | O(7) <sup>#4</sup> -Co(2)-N(6) <sup>#5</sup> | 89.17(14)  |
| O(5)-Co(1)-O(1) <sup>#1</sup>                | 92.96(12)  | O(4)-Co(2)-O(8) <sup>#4</sup>                | 94.97(12)  |
| N(1)-Co(1)-O(1) <sup>#1</sup>                | 159.68(14) | N(3) <sup>#3</sup> -Co(2)-O(8) <sup>#4</sup> | 159.39(14) |
| N(5)-Co(1)-O(1) <sup>#1</sup>                | 87.58(14)  | N(7)-Co(2)-O(8) <sup>#4</sup>                | 90.08(13)  |
| O(2) <sup>#1</sup> -Co(1)-O(1) <sup>#1</sup> | 60.84(11)  | O(7) <sup>#4</sup> -Co(2)-O(8) <sup>#4</sup> | 61.01(11)  |
| N(8) <sup>#2</sup> -Co(1)-O(1) <sup>#1</sup> | 91.78(15)  | N(6) <sup>#5</sup> -Co(2)-O(8) <sup>#4</sup> | 87.48(14)  |

---

Compound **2-N**

---

|                                              |            |                                              |            |
|----------------------------------------------|------------|----------------------------------------------|------------|
| Co(1)-O(1)                                   | 2.054(2)   | Co(1)-N(3)                                   | 2.150(3)   |
| Co(1)-N(1) <sup>#1</sup>                     | 2.127(3)   | Co(1)-N(6) <sup>#3</sup>                     | 2.163(3)   |
| Co(1)-O(3) <sup>#2</sup>                     | 2.141(2)   | Co(1)-O(4) <sup>#2</sup>                     | 2.166(2)   |
| O(1)-Co(1)-N(1) <sup>#1</sup>                | 108.10(10) | O(3) <sup>#2</sup> -Co(1)-N(6) <sup>#3</sup> | 89.20(10)  |
| O(1)-Co(1)-O(3) <sup>#2</sup>                | 155.52(10) | N(3)-Co(1)-N(6) <sup>#3</sup>                | 176.90(11) |
| N(1) <sup>#1</sup> -Co(1)-O(3) <sup>#2</sup> | 96.38(10)  | O(1)-Co(1)-O(4) <sup>#2</sup>                | 94.36(9)   |
| O(1)-Co(1)-N(3)                              | 90.69(10)  | N(1) <sup>#1</sup> -Co(1)-O(4) <sup>#2</sup> | 157.48(10) |
| N(1) <sup>#1</sup> -Co(1)-N(3)               | 92.44(12)  | O(3) <sup>#2</sup> -Co(1)-O(4) <sup>#2</sup> | 61.16(8)   |
| O(3) <sup>#2</sup> -Co(1)-N(3)               | 88.64(9)   | N(3)-Co(1)-O(4) <sup>#2</sup>                | 88.85(10)  |
| O(1)-Co(1)-N(6) <sup>#3</sup>                | 90.35(10)  | N(6) <sup>#3</sup> -Co(1)-O(4) <sup>#2</sup> | 88.16(10)  |
| N(1) <sup>#1</sup> -Co(1)-N(6) <sup>#3</sup> | 90.01(12)  |                                              |            |

---

**Symmetry codes:** For **1**, #1:  $x, -y+1/2, z+1/2$ ; #2:  $x-1/2, -y+1/2, -z+1$ ; #3:  $x+1/2, -y+1/2, -z+1$ ; #4:  $x, -y+1/2, z-1/2$ . For **2-H**, #1:  $x, y-1, z$ ; #2:  $x-1/2, -y+1, z-1/2$ ; #3:  $x, y+1, z$ ; #4:  $x+1, y, z$ ; #5:  $x+1/2, -y+1, z-1/2$ . For **2-F**, #1:  $x, -y, z+1/2$ ; #2:  $x+1/2, -y+1/2, z+1/2$ ; #3:  $x, y, z-1$ ; #4:  $x, -y+1, z-1/2$ ; #5:  $x+1/2, -y+1/2, z-1/2$ . For **2-N**, #1:  $x, -y+1, z+1/2$ ; #2:  $x, y-1, z$ ; #3:  $x-1, y, z$ ; #4:  $x, y+1, z$ ; #5:  $x, -y+1, z-1/2$ .

**Table S3.** Hydrogen bonds for **1** [ $\text{\AA}$  and  $^\circ$ ].

| D-H...A                             | d(D-H)    | d(H...A)  | d(D...A) | <(DHA)    |
|-------------------------------------|-----------|-----------|----------|-----------|
| O(1W)-H(1WA)...O(1) <sup>#5</sup>   | 0.848(9)  | 1.874(11) | 2.713(2) | 170(2)    |
| O(1W)-H(1WB)...O(3) <sup>#6</sup>   | 0.851(9)  | 2.028(15) | 2.763(2) | 144.0(18) |
| O(2W)-H(2WA)...O(3) <sup>#7</sup>   | 0.844(9)  | 1.979(11) | 2.809(2) | 168(2)    |
| O(2W)-H(2WB)...O(3W) <sup>#8</sup>  | 0.850(9)  | 1.906(10) | 2.756(2) | 179(2)    |
| O(3W)-H(3WA)...O(4W)                | 0.839(9)  | 1.887(11) | 2.686(2) | 159(2)    |
| O(3W)-H(3WB)...O(1)                 | 0.844(9)  | 1.896(11) | 2.695(2) | 157(2)    |
| O(4W)-H(4WA)...O(4) <sup>#9</sup>   | 0.849(9)  | 1.930(10) | 2.776(2) | 174(3)    |
| O(4W)-H(4WB)...O(3W) <sup>#10</sup> | 0.852(9)  | 1.959(11) | 2.802(2) | 170(2)    |
| N(1)-H(1N)...O(2) <sup>#4</sup>     | 0.857(10) | 2.40(2)   | 2.927(2) | 120(2)    |

**Symmetry codes:** #1  $x, -y+1/2, z+1/2$ ; #2  $x-1/2, -y+1/2, -z+1$ ; #3  $x+1/2, -y+1/2, -z+1$ ; #4  $x, -y+1/2, z-1/2$ ; #5  $-x+1, -y+1, -z+1$ ; #6  $-x+3/2, y+1/2, z$ ; #7  $-x+3/2, y-1/2, z$ ; #8  $-x+1, -y, -z+1$ ; #9  $x-1/2, y, -z+1/2$ ; #10  $-x+1, y-1/2, -z+1/2$ .

**Table S4.** Supplemental summary of the porosity parameters and adsorption properties of **2-H**, **2-F** and **2-N**.

| Compounds  | $S_{\text{Langmuir}}^a$<br>( $\text{m}^2 \text{g}^{-1}$ ) | CO <sub>2</sub> Uptake<br>( $\text{cm}^3 \text{g}^{-1}$ ) |       |       | N <sub>2</sub> Uptake<br>( $\text{cm}^3 \text{g}^{-1}, 273 \text{K}$ ) | CH <sub>4</sub> Uptake<br>( $\text{cm}^3 \text{g}^{-1}, 273 \text{K}$ ) |
|------------|-----------------------------------------------------------|-----------------------------------------------------------|-------|-------|------------------------------------------------------------------------|-------------------------------------------------------------------------|
|            |                                                           | 273 K                                                     | 283 K | 293 K |                                                                        |                                                                         |
| <b>2-H</b> | 620.4                                                     | 74.4                                                      | 63.0  | 50.9  | 4.0                                                                    | 24.4                                                                    |
| <b>2-F</b> | 601.6                                                     | 63.7                                                      | 54.4  | 46.0  | 6.5                                                                    | 22.5                                                                    |
| <b>2-N</b> | 558.2                                                     | 60.6                                                      | 52.6  | 40.9  | -                                                                      | 22.9                                                                    |

<sup>a</sup> Calculated by the CO<sub>2</sub> uptake at 195 K.

**Table S5.** All data points for the CO<sub>2</sub> adsorption-desorption isotherms at 273K for **2-H** in 5 cycles.

| Cycle 1                  |                                           | Cycle 2                  |                                           | Cycle 3                  |                                           | Cycle 4                  |                                           | Cycle 5                  |                                           |
|--------------------------|-------------------------------------------|--------------------------|-------------------------------------------|--------------------------|-------------------------------------------|--------------------------|-------------------------------------------|--------------------------|-------------------------------------------|
| Absolute Pressure (mmHg) | Uptake (cm <sup>3</sup> g <sup>-1</sup> ) | Absolute Pressure (mmHg) | Uptake (cm <sup>3</sup> g <sup>-1</sup> ) | Absolute Pressure (mmHg) | Uptake (cm <sup>3</sup> g <sup>-1</sup> ) | Absolute Pressure (mmHg) | Uptake (cm <sup>3</sup> g <sup>-1</sup> ) | Absolute Pressure (mmHg) | Uptake (cm <sup>3</sup> g <sup>-1</sup> ) |
| 1.36809                  | 0.369556                                  | 1.385177                 | 0.335788                                  | 1.392947                 | 0.321538                                  | 1.394853                 | 0.318309                                  | 1.39019                  | 0.330882                                  |
| 3.585912                 | 0.923749                                  | 3.593106                 | 0.875632                                  | 3.595346                 | 0.856517                                  | 3.597366                 | 0.850649                                  | 3.597901                 | 0.868671                                  |
| 5.33361                  | 1.373497                                  | 5.366741                 | 1.30353                                   | 5.382579                 | 1.258832                                  | 5.378239                 | 1.27304                                   | 5.392526                 | 1.30588                                   |
| 9.958709                 | 2.53717                                   | 10.16754                 | 2.456705                                  | 10.20648                 | 2.433352                                  | 10.22264                 | 2.44744                                   | 9.971226                 | 2.429367                                  |
| 28.75061                 | 6.986091                                  | 28.83953                 | 6.863705                                  | 28.94398                 | 6.84182                                   | 28.76014                 | 6.818912                                  | 28.98223                 | 6.892552                                  |
| 59.93111                 | 13.95576                                  | 60.24474                 | 13.82384                                  | 60.09139                 | 13.73154                                  | 60.17804                 | 13.79305                                  | 60.16314                 | 13.73088                                  |
| 80.15031                 | 18.16282                                  | 80.11514                 | 17.93062                                  | 80.01728                 | 17.83133                                  | 80.00745                 | 17.89291                                  | 79.99683                 | 17.76086                                  |
| 100.2819                 | 22.08954                                  | 100.2425                 | 21.81528                                  | 100.2365                 | 21.77697                                  | 100.2686                 | 21.80616                                  | 100.0981                 | 21.60151                                  |
| 120.2533                 | 25.71541                                  | 120.2746                 | 25.43858                                  | 120.3487                 | 25.37949                                  | 120.2306                 | 25.40257                                  | 120.0839                 | 25.12814                                  |
| 140.0383                 | 29.05337                                  | 140.2979                 | 28.77157                                  | 140.2739                 | 28.7419                                   | 140.3646                 | 28.79978                                  | 140.2887                 | 28.44717                                  |
| 160.2049                 | 32.23975                                  | 160.1494                 | 31.86948                                  | 160.3944                 | 31.88178                                  | 160.1455                 | 31.89629                                  | 160.2981                 | 31.496                                    |
| 180.0579                 | 35.13071                                  | 180.4104                 | 34.80452                                  | 180.3636                 | 34.79768                                  | 180.3003                 | 34.83211                                  | 180.3202                 | 34.34031                                  |
| 200.2651                 | 37.86642                                  | 200.3033                 | 37.48481                                  | 200.2933                 | 37.49359                                  | 200.3229                 | 37.54904                                  | 200.3181                 | 36.99162                                  |
| 249.3611                 | 43.70158                                  | 249.3001                 | 43.25611                                  | 249.5046                 | 43.3332                                   | 249.6632                 | 43.37594                                  | 249.6523                 | 42.6474                                   |
| 300.3957                 | 48.83307                                  | 300.2243                 | 48.35611                                  | 300.2331                 | 48.4318                                   | 300.3121                 | 48.42476                                  | 300.1058                 | 47.51547                                  |
| 349.9708                 | 53.11813                                  | 350.1653                 | 52.64295                                  | 350.1445                 | 52.72206                                  | 350.304                  | 52.72757                                  | 350.1956                 | 51.67479                                  |
| 400.1248                 | 56.87745                                  | 400.2668                 | 56.37621                                  | 400.0444                 | 56.44897                                  | 400.0992                 | 56.44216                                  | 400.0036                 | 55.22125                                  |
| 450.0631                 | 60.14915                                  | 450.1322                 | 59.64575                                  | 450.1308                 | 59.75235                                  | 450.2896                 | 59.74227                                  | 450.2433                 | 58.35384                                  |
| 500.1962                 | 63.08899                                  | 500.1954                 | 62.55348                                  | 500.041                  | 62.6949                                   | 500.1564                 | 62.63758                                  | 500.1472                 | 61.12828                                  |
| 550.1709                 | 65.71827                                  | 550.0969                 | 65.17866                                  | 550.2241                 | 65.34997                                  | 550.0154                 | 65.26715                                  | 550.1158                 | 63.59511                                  |
| 600.2766                 | 68.11637                                  | 600.1664                 | 67.54572                                  | 600.1186                 | 67.75195                                  | 600.1964                 | 67.66674                                  | 600.0145                 | 65.83257                                  |
| 650.0587                 | 70.29608                                  | 650.0931                 | 69.75887                                  | 650.2767                 | 69.98189                                  | 650.106                  | 69.84848                                  | 649.8946                 | 67.87524                                  |
| 699.9361                 | 72.31548                                  | 700.165                  | 71.77217                                  | 700.1436                 | 72.00248                                  | 700.1552                 | 71.86117                                  | 700.0994                 | 69.77271                                  |

|          |          |          |          |          |          |          |          |          |          |
|----------|----------|----------|----------|----------|----------|----------|----------|----------|----------|
| 750.0529 | 74.19301 | 750.1514 | 73.64892 | 749.9687 | 73.90199 | 750.1528 | 73.72997 | 749.8622 | 71.50705 |
| 800.031  | 75.9519  | 799.9911 | 75.38129 | 800.1117 | 75.66612 | 800.1411 | 75.49296 | 800.0151 | 73.15869 |
| 757.6609 | 75.12731 | 757.4623 | 74.54806 | 757.8994 | 74.81891 | 758.1835 | 74.60451 | 757.8325 | 72.28644 |
| 715.6391 | 74.05023 | 715.4587 | 73.42908 | 716.2026 | 73.70668 | 716.092  | 73.46962 | 716.0661 | 71.19279 |
| 650.0718 | 71.78753 | 650.0959 | 71.22684 | 649.9652 | 71.37652 | 649.8436 | 71.15026 | 649.8407 | 69.02861 |
| 599.6774 | 69.7453  | 599.8844 | 69.19746 | 599.7054 | 69.32073 | 599.7091 | 69.12522 | 599.7162 | 67.12291 |
| 549.9175 | 67.52044 | 549.8755 | 66.93252 | 549.9377 | 67.04403 | 549.9469 | 66.84823 | 549.8328 | 64.95092 |
| 500.0258 | 65.01711 | 499.959  | 64.37696 | 499.8534 | 64.48447 | 499.9285 | 64.32325 | 499.9236 | 62.5437  |
| 449.9962 | 62.18953 | 449.9969 | 61.53313 | 449.9444 | 61.61765 | 449.9754 | 61.4848  | 449.9665 | 59.7999  |
| 400.0059 | 58.96238 | 399.9697 | 58.30556 | 400.0618 | 58.38427 | 400.0356 | 58.25954 | 400.0107 | 56.68636 |
| 350.0353 | 55.24711 | 350.0515 | 54.61656 | 350.0087 | 54.6578  | 350.1025 | 54.55506 | 350.0865 | 53.12161 |
| 300.0862 | 50.96598 | 300.0789 | 50.33286 | 300.0866 | 50.35769 | 300.0615 | 50.26795 | 300.0799 | 48.95389 |
| 250.1356 | 45.92455 | 250.1198 | 45.28485 | 250.1611 | 45.30377 | 250.176  | 45.21878 | 250.1257 | 44.05741 |
| 200.1551 | 39.94126 | 200.1243 | 39.33673 | 200.1368 | 39.31036 | 200.1381 | 39.21587 | 200.1521 | 38.22946 |
| 150.1873 | 32.78074 | 150.2256 | 32.19231 | 150.2014 | 32.1575  | 150.1897 | 32.06097 | 150.2112 | 31.21178 |
| 100.2211 | 24.14729 | 100.1801 | 23.5951  | 100.2316 | 23.54082 | 100.2455 | 23.44063 | 100.1985 | 22.75768 |
| 50.20612 | 13.7704  | 50.21885 | 13.30601 | 50.19298 | 13.24552 | 50.20264 | 13.11306 | 50.22752 | 12.60927 |
| 19.75611 | 6.538559 | 19.80734 | 6.040974 | 19.74458 | 6.037193 | 19.77704 | 5.897957 | 19.60733 | 5.443108 |
| 14.77271 | 5.138161 | 14.73694 | 4.61967  | 14.76378 | 4.656737 | 14.76664 | 4.52593  | 14.74913 | 4.141254 |

**Table S6.** All data points for the CO<sub>2</sub> adsorption-desorption isotherms at 273K for 2-F in 5 cycles.

| Cycle 1                  |                                           | Cycle 2                  |                                           | Cycle 3                  |                                           | Cycle 4                  |                                           | Cycle 5                  |                                           |
|--------------------------|-------------------------------------------|--------------------------|-------------------------------------------|--------------------------|-------------------------------------------|--------------------------|-------------------------------------------|--------------------------|-------------------------------------------|
| Absolute Pressure (mmHg) | Uptake (cm <sup>3</sup> g <sup>-1</sup> ) | Absolute Pressure (mmHg) | Uptake (cm <sup>3</sup> g <sup>-1</sup> ) | Absolute Pressure (mmHg) | Uptake (cm <sup>3</sup> g <sup>-1</sup> ) | Absolute Pressure (mmHg) | Uptake (cm <sup>3</sup> g <sup>-1</sup> ) | Absolute Pressure (mmHg) | Uptake (cm <sup>3</sup> g <sup>-1</sup> ) |
| 1.39715                  | 0.382487                                  | 1.40242                  | 0.36980                                   | 1.40020                  | 0.37466                                   | 1.40076                  | 0.37252                                   | 1.40335                  | 0.36641                                   |
| 3.608788                 | 1.005916                                  | 3.61152                  | 0.98497                                   | 3.61012                  | 0.99402                                   | 3.61046                  | 0.98826                                   | 3.61285                  | 0.97613                                   |
| 5.1108                   | 1.4191                                    | 5.12843                  | 1.38718                                   | 5.11616                  | 1.41071                                   | 5.41467                  | 1.49202                                   | 5.13201                  | 1.35392                                   |
| 10.1547                  | 2.815649                                  | 10.21793                 | 2.80272                                   | 10.16886                 | 2.85693                                   | 10.23767                 | 2.80027                                   | 10.13881                 | 2.72004                                   |

|          |          |           |          |           |          |           |          |           |          |
|----------|----------|-----------|----------|-----------|----------|-----------|----------|-----------|----------|
| 29.0838  | 7.73391  | 29.12233  | 7.71159  | 29.20486  | 7.80035  | 28.89867  | 7.60632  | 29.16381  | 7.65891  |
| 60.44421 | 14.96248 | 60.43523  | 14.91183 | 60.24186  | 14.92231 | 60.24627  | 14.79735 | 60.21592  | 14.76242 |
| 79.92251 | 18.89761 | 80.26034  | 18.89335 | 80.15296  | 18.95450 | 80.28777  | 18.81501 | 80.03481  | 18.73809 |
| 100.1732 | 22.5673  | 100.01592 | 22.44911 | 100.32057 | 22.62894 | 100.28188 | 22.44164 | 100.21181 | 22.36862 |
| 120.1932 | 25.82526 | 120.26713 | 25.78432 | 120.34297 | 25.87686 | 120.30067 | 25.72207 | 120.29441 | 25.63496 |
| 140.1973 | 28.77759 | 140.38194 | 28.75488 | 140.14937 | 28.82900 | 140.37268 | 28.67764 | 140.36942 | 28.58924 |
| 160.2346 | 31.46419 | 160.28595 | 31.41993 | 160.18436 | 31.55700 | 160.24529 | 31.34941 | 160.27502 | 31.24175 |
| 180.2828 | 33.91528 | 180.17014 | 33.86868 | 180.27896 | 34.03062 | 180.29605 | 33.80026 | 180.35280 | 33.68733 |
| 200.3199 | 36.14662 | 200.29073 | 36.12826 | 200.14288 | 36.27696 | 200.15468 | 36.02013 | 200.23340 | 35.91743 |
| 249.9618 | 40.86258 | 249.75774 | 40.90981 | 249.88338 | 41.09713 | 249.54697 | 40.76849 | 249.92102 | 40.68197 |
| 300.2664 | 44.83945 | 300.31296 | 44.95651 | 300.29480 | 45.14533 | 300.29816 | 44.83289 | 300.33554 | 44.71367 |
| 350.2136 | 48.19692 | 350.11298 | 48.34429 | 350.16666 | 48.53359 | 350.35312 | 48.21834 | 349.97723 | 48.07315 |
| 400.1848 | 51.08785 | 400.35419 | 51.27233 | 400.24161 | 51.48382 | 400.13065 | 51.11446 | 400.26636 | 51.04623 |
| 450.0875 | 53.61602 | 450.15659 | 53.85141 | 450.28696 | 54.08296 | 450.23969 | 53.68862 | 450.18741 | 53.59551 |
| 500.213  | 55.86916 | 500.35785 | 56.13975 | 500.11737 | 56.36233 | 500.14590 | 55.96879 | 500.09464 | 55.90997 |
| 550.1884 | 57.88785 | 550.26385 | 58.20360 | 549.99768 | 58.44771 | 550.02618 | 58.03492 | 550.05164 | 57.98714 |
| 600.2662 | 59.71464 | 600.01111 | 60.08959 | 600.20941 | 60.36478 | 600.17517 | 59.93951 | 600.13959 | 59.89087 |
| 650.0385 | 61.39627 | 650.27356 | 61.82228 | 650.15833 | 62.11933 | 650.00787 | 61.66795 | 650.10278 | 61.61118 |
| 700.0517 | 62.95214 | 700.17389 | 63.40571 | 700.16333 | 63.74887 | 700.09570 | 63.28087 | 700.13403 | 63.18584 |
| 750.0906 | 64.43349 | 750.08990 | 64.90870 | 750.04755 | 65.26180 | 750.03802 | 64.78343 | 750.12952 | 64.70604 |
| 800.0551 | 65.79123 | 800.14063 | 66.30100 | 800.11066 | 66.68632 | 800.13373 | 66.17432 | 799.95374 | 66.09399 |
| 764.8101 | 65.37269 | 765.03400 | 65.84480 | 765.09430 | 66.28898 | 765.02759 | 65.74404 | 764.79193 | 65.57450 |
| 707.318  | 64.37388 | 707.49402 | 64.67244 | 707.27539 | 65.17642 | 707.18073 | 64.67508 | 707.09900 | 64.44684 |
| 649.701  | 62.83198 | 649.92194 | 63.10098 | 649.80890 | 63.56586 | 650.04675 | 63.15428 | 649.82379 | 62.85719 |
| 599.7562 | 61.29388 | 599.88922 | 61.50682 | 599.76221 | 61.96242 | 599.84058 | 61.56307 | 599.80200 | 61.22564 |
| 549.9033 | 59.57033 | 549.91992 | 59.72332 | 549.99231 | 60.18039 | 549.93762 | 59.78054 | 549.90948 | 59.43536 |
| 499.9754 | 57.6922  | 500.02032 | 57.72471 | 499.90436 | 58.18626 | 499.95297 | 57.79795 | 499.85040 | 57.44262 |
| 449.9396 | 55.57045 | 449.94620 | 55.49452 | 449.99457 | 55.93532 | 449.95929 | 55.56612 | 449.92987 | 55.19909 |
| 399.9728 | 53.12272 | 400.06924 | 52.97858 | 400.00967 | 53.38443 | 400.05658 | 53.02665 | 400.02704 | 52.67701 |

|          |          |           |          |           |          |           |          |           |          |
|----------|----------|-----------|----------|-----------|----------|-----------|----------|-----------|----------|
| 350.0453 | 50.24271 | 350.04535 | 50.08022 | 350.03342 | 50.46005 | 350.03033 | 50.10070 | 350.04984 | 49.75602 |
| 300.022  | 46.8403  | 300.06097 | 46.68411 | 300.04739 | 47.06776 | 300.04108 | 46.72337 | 300.03625 | 46.37126 |
| 250.0744 | 42.76477 | 250.12363 | 42.65915 | 250.12236 | 43.03787 | 250.14487 | 42.70316 | 250.14401 | 42.33842 |
| 200.1324 | 37.85212 | 200.15422 | 37.77557 | 200.12625 | 38.15253 | 200.13579 | 37.84692 | 200.11752 | 37.46593 |
| 150.188  | 31.77564 | 150.19231 | 31.78239 | 150.18936 | 32.13523 | 150.21448 | 31.84187 | 150.20680 | 31.46255 |
| 100.2554 | 24.08658 | 100.31274 | 24.16246 | 100.27897 | 24.50750 | 100.27367 | 24.24380 | 100.28783 | 23.81527 |
| 50.52501 | 14.1084  | 50.61554  | 14.23701 | 50.50816  | 14.58860 | 50.53268  | 14.37012 | 50.58361  | 13.91735 |
| 19.7145  | 6.385713 | 19.82313  | 6.52021  | 19.64636  | 6.91117  | 19.71567  | 6.64243  | 19.74921  | 6.24998  |
| 14.5934  | 4.860333 | 14.59073  | 4.99958  | 14.60616  | 5.39331  | 14.55117  | 5.16987  | 14.60281  | 4.73946  |

**Table S7.** All data points for the CO<sub>2</sub> adsorption-desorption isotherms at 273K for 2-N in 5 cycles.

| Cycle 1                  |                                           | Cycle 2                  |                                           | Cycle 3                  |                                           | Cycle 4                  |                                           | Cycle 5                  |                                           |
|--------------------------|-------------------------------------------|--------------------------|-------------------------------------------|--------------------------|-------------------------------------------|--------------------------|-------------------------------------------|--------------------------|-------------------------------------------|
| Absolute Pressure (mmHg) | Uptake (cm <sup>3</sup> g <sup>-1</sup> ) | Absolute Pressure (mmHg) | Uptake (cm <sup>3</sup> g <sup>-1</sup> ) | Absolute Pressure (mmHg) | Uptake (cm <sup>3</sup> g <sup>-1</sup> ) | Absolute Pressure (mmHg) | Uptake (cm <sup>3</sup> g <sup>-1</sup> ) | Absolute Pressure (mmHg) | Uptake (cm <sup>3</sup> g <sup>-1</sup> ) |
| 1.484025                 | 0.294564                                  | 1.48733                  | 0.282043                                  | 1.486998                 | 0.282754                                  | 1.486313                 | 0.285806                                  | 1.484508                 | 0.292761                                  |
| 3.74583                  | 0.788184                                  | 3.74762                  | 0.769433                                  | 3.748361                 | 0.767676                                  | 3.746827                 | 0.776781                                  | 3.74685                  | 0.783802                                  |
| 5.372681                 | 1.158907                                  | 5.383819                 | 1.118188                                  | 5.370049                 | 1.149665                                  | 5.373077                 | 1.095944                                  | 5.361691                 | 1.133007                                  |
| 10.10408                 | 2.168318                                  | 10.31142                 | 2.211791                                  | 10.28415                 | 2.239922                                  | 10.23458                 | 2.183624                                  | 10.28249                 | 2.194794                                  |
| 29.68908                 | 6.242215                                  | 29.68992                 | 6.353627                                  | 29.76445                 | 6.429312                                  | 29.64569                 | 6.235673                                  | 29.59769                 | 6.233303                                  |
| 60.17448                 | 12.28245                                  | 60.29833                 | 12.48109                                  | 60.32716                 | 12.55871                                  | 60.06069                 | 12.24341                                  | 60.29719                 | 12.36463                                  |
| 80.33768                 | 15.94563                                  | 80.25193                 | 16.1535                                   | 80.06315                 | 16.19796                                  | 80.28209                 | 15.94943                                  | 80.19849                 | 16.03202                                  |
| 100.2633                 | 19.24953                                  | 100.3093                 | 19.55114                                  | 100.2493                 | 19.59952                                  | 100.2475                 | 19.31966                                  | 100.4002                 | 19.40915                                  |
| 120.3417                 | 22.30632                                  | 120.0659                 | 22.61063                                  | 120.3146                 | 22.70844                                  | 120.3897                 | 22.37559                                  | 120.2321                 | 22.43157                                  |
| 140.253                  | 25.0713                                   | 140.3484                 | 25.50774                                  | 140.3317                 | 25.54651                                  | 140.1266                 | 25.13011                                  | 140.2204                 | 25.24277                                  |
| 160.1048                 | 27.62553                                  | 160.2674                 | 28.0595                                   | 160.3383                 | 28.14932                                  | 160.0635                 | 27.64179                                  | 160.2241                 | 27.81383                                  |
| 180.3971                 | 29.96613                                  | 180.1137                 | 30.39166                                  | 180.3259                 | 30.51362                                  | 180.1929                 | 29.98923                                  | 180.2078                 | 30.17639                                  |
| 200.2812                 | 32.09277                                  | 200.3645                 | 32.56967                                  | 200.2937                 | 32.67925                                  | 200.3262                 | 32.12449                                  | 200.3741                 | 32.38034                                  |
| 250.1456                 | 36.55122                                  | 249.9879                 | 37.04857                                  | 250.1354                 | 37.19464                                  | 250.0265                 | 36.56607                                  | 249.9761                 | 36.86552                                  |

|          |          |          |          |          |          |          |          |          |          |
|----------|----------|----------|----------|----------|----------|----------|----------|----------|----------|
| 300.2969 | 40.26943 | 300.3056 | 40.79375 | 300.2919 | 40.99763 | 300.2619 | 40.27436 | 300.3001 | 40.63239 |
| 349.8885 | 43.37118 | 350.1744 | 43.98913 | 350.1793 | 44.2194  | 350.2742 | 43.39847 | 350.1861 | 43.82751 |
| 400.1191 | 46.0589  | 400.2319 | 46.72318 | 400.248  | 47.05179 | 400.2391 | 46.10515 | 400.2041 | 46.58911 |
| 450.0667 | 48.40452 | 450.1652 | 49.11111 | 450.1426 | 49.53495 | 450.0405 | 48.50047 | 450.1034 | 49.07173 |
| 500.1095 | 50.61574 | 500.0046 | 51.2438  | 500.2045 | 51.77548 | 500.1709 | 50.65473 | 500.1142 | 51.21224 |
| 550.1467 | 52.67725 | 550.2274 | 53.18872 | 550.2269 | 53.79656 | 550.0616 | 52.59463 | 550.1102 | 53.19884 |
| 600.2922 | 54.56289 | 600.078  | 54.95754 | 600.2708 | 55.69441 | 600.2031 | 54.40211 | 600.0616 | 55.04124 |
| 650.1097 | 56.2176  | 650.1075 | 56.6271  | 650.0718 | 57.42175 | 650.1094 | 56.09838 | 650.2587 | 56.74509 |
| 700.0023 | 57.73705 | 700.1356 | 58.19916 | 699.992  | 59.09297 | 700.1831 | 57.71357 | 700.0417 | 58.37339 |
| 750.0646 | 59.1929  | 750.2457 | 59.6975  | 750.0818 | 60.63373 | 750.0267 | 59.17909 | 750.2457 | 59.92613 |
| 800.0736 | 60.5668  | 800.1425 | 61.07301 | 800.0121 | 62.11206 | 799.9852 | 60.60926 | 800.1603 | 61.37449 |
| 762.5773 | 61.05072 | 762.383  | 61.74094 | 761.9779 | 62.75054 | 761.6421 | 61.30946 | 762.5302 | 61.89196 |
| 713.6211 | 60.96544 | 712.897  | 61.73825 | 712.9297 | 62.6351  | 712.3303 | 61.12243 | 713.108  | 61.76857 |
| 650.1796 | 59.5911  | 650.1299 | 60.24682 | 650.1593 | 61.06785 | 650.0646 | 59.62709 | 650.2941 | 60.24374 |
| 599.691  | 58.20139 | 599.6826 | 58.76767 | 599.7137 | 59.55279 | 599.6102 | 58.13147 | 599.705  | 58.74274 |
| 549.8683 | 56.61918 | 549.8303 | 57.12053 | 549.9076 | 57.88323 | 549.8607 | 56.46472 | 549.8317 | 57.12391 |
| 499.9427 | 54.8095  | 499.956  | 55.30911 | 499.9346 | 56.00607 | 499.8855 | 54.5873  | 499.9393 | 55.30913 |
| 449.9445 | 52.73555 | 449.9277 | 53.25976 | 449.9506 | 53.91173 | 449.9317 | 52.47784 | 449.9726 | 53.23327 |
| 399.9571 | 50.40983 | 400.0224 | 50.93043 | 400.0137 | 51.51466 | 399.9988 | 50.09645 | 399.9531 | 50.85825 |
| 350.0722 | 47.70611 | 349.997  | 48.24378 | 350.0406 | 48.73379 | 350.0175 | 47.37234 | 349.9903 | 48.13286 |
| 300.0386 | 44.544   | 300.0266 | 45.09796 | 300.0394 | 45.50398 | 300.0667 | 44.17102 | 300.0661 | 44.90931 |
| 250.0713 | 40.83056 | 250.0585 | 41.39497 | 250.1007 | 41.6937  | 250.0845 | 40.3827  | 250.0327 | 41.0923  |
| 200.1399 | 36.21573 | 200.1413 | 36.81807 | 200.1357 | 37.03622 | 200.1215 | 35.68391 | 200.1321 | 36.49291 |
| 150.1467 | 30.46915 | 150.1449 | 31.01806 | 150.1516 | 31.24463 | 150.1127 | 29.86393 | 150.1702 | 30.73046 |
| 100.1701 | 23.29644 | 100.1459 | 23.72237 | 100.1711 | 24.01846 | 100.1661 | 22.573   | 100.1573 | 23.51345 |
| 50.24008 | 14.11539 | 50.24202 | 14.34176 | 50.27125 | 14.7056  | 50.21708 | 13.34218 | 50.24609 | 14.26699 |
| 22.59218 | 8.053312 | 22.60472 | 8.176694 | 22.54865 | 8.657723 | 22.63168 | 7.375786 | 22.55849 | 8.243338 |
| 14.93068 | 6.101818 | 14.93632 | 6.156329 | 14.97805 | 6.664535 | 14.96908 | 5.400606 | 14.95579 | 6.269755 |



## References

- S1. B.-Q. Song, Q.-Y. Yang, S.-Q. Wang, M. Vandichel, A. Kumar, C. Crowley, N. Kumar, C.-H. Deng, V. GasconPerez, M. Lusi, H. Wu, W. Zhou and M. J. Zaworotko, *J. Am. Chem. Soc.*, 2020, **142**, 6896-6901; Y. He, S. Xiang and B. Chen, *J. Am. Chem. Soc.*, 2011, **133**, 14570-14573.
- S2. A. L. Myers and J. M. Prausnitz, *AIChE J.*, 1965, **11**, 121.
